# Supplementary material for: The Effect in Renal Function and Vascular Decongestion in Type 1 Cardiorenal Syndrome Treated with Two Strategies of Diuretics, a Randomized Trial
Source: Research Square preprint supplement (doi:10.21203/rs.3.rs-788038/v1), 2021-08-06
Supplement: Supplementary file 1 [file 56e3dc987952c5cbae8cfd80.docx]

**Supplemental figure 1.** Assignation and intervention of the study trial.
